# Supplementary material for: Antimony(i) → Pd(ii) complexes with the (μ-Sb)Pd2coordination framework
Source: Royal Society of Chemistry journal article supplement (doi:10.1039/c9dt02340b), 2019-01-01
Supplement: c9dt02340b1.pdf [file c9dt02340b1.pdf]

## Supplementary material for:

### **Antimony(I)→Pd(II) complexes with ( $\mu$ -Sb)Pd<sub>2</sub> coordination framework**

Monika Kořenková, Martin Hejda, Theresa Block, Filip Uhlík, Roman Jambor,  
Aleš Růžička, Rainer Pöttgen and Libor Dostál

#### **Table of contents:**

|                                                                                                             |                    |
|-------------------------------------------------------------------------------------------------------------|--------------------|
| <sup>1</sup> H and <sup>13</sup> C NMR spectra of compounds <b>2–5</b> in CDCl <sub>3</sub>                 | <b>page S2-S5</b>  |
| <sup>1</sup> H NMR spectra showing decomposition of compounds <b>2</b> and <b>5</b> in chlorinated solvents | <b>page S6-S7</b>  |
| <sup>1</sup> H and <sup>13</sup> C NMR NMR spectra of compounds <b>2–5</b> in CD <sub>3</sub> CN            | <b>page S8-S12</b> |
| Table S1 summarizing the crystallographic data                                                              | <b>page S13</b>    |

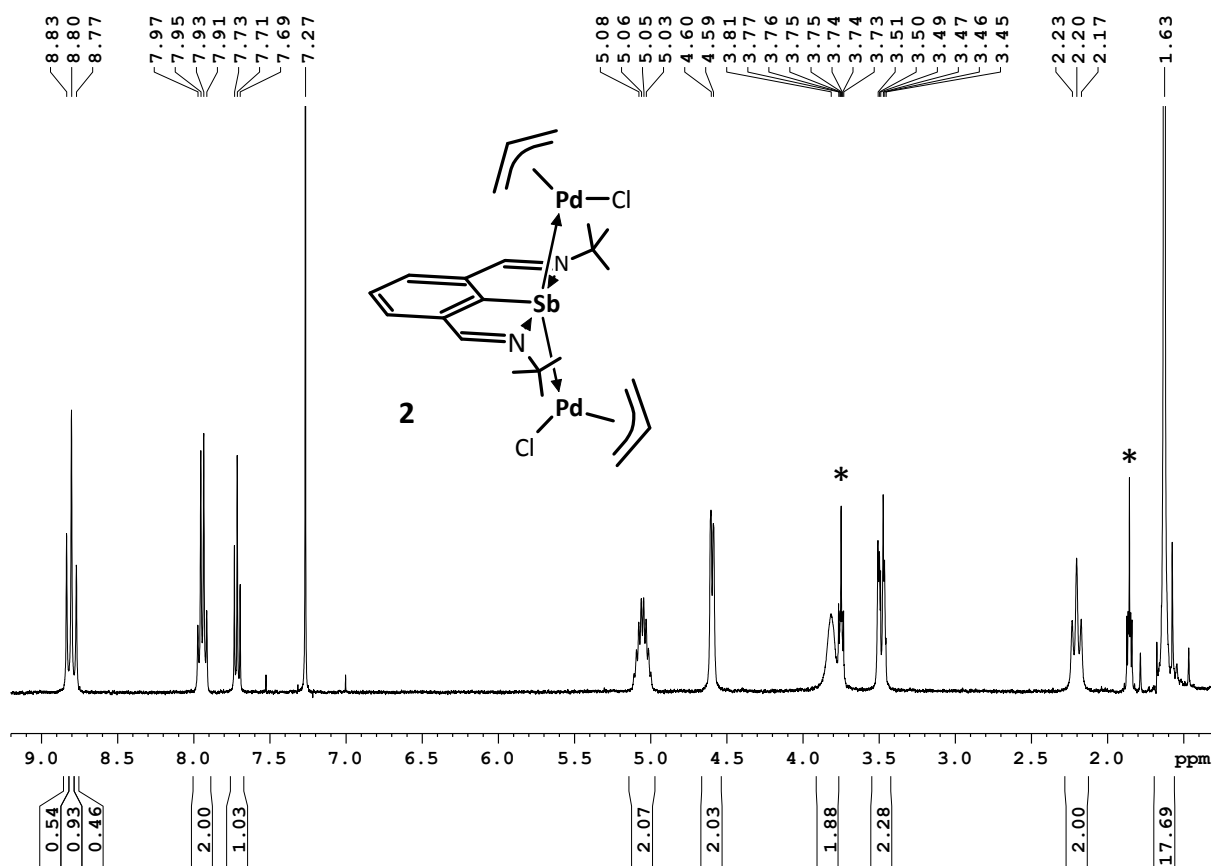

Figure S1: <sup>1</sup>H NMR of compound 2 (500.20 MHz, CDCl<sub>3</sub>, 294 K). \* - traces of THF.

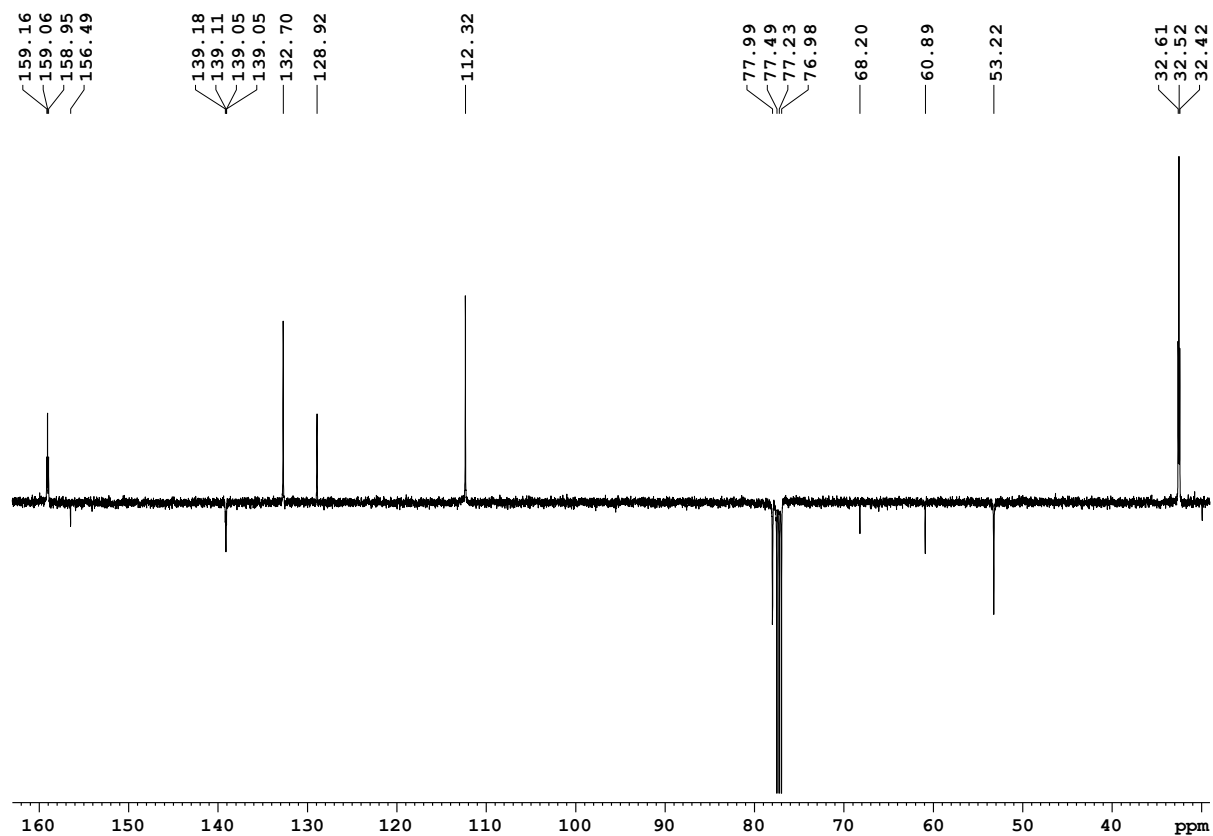

Figure S2: <sup>13</sup>C{<sup>1</sup>H} APT NMR of compound 2 (125.78 MHz, CDCl<sub>3</sub>, 294 K).

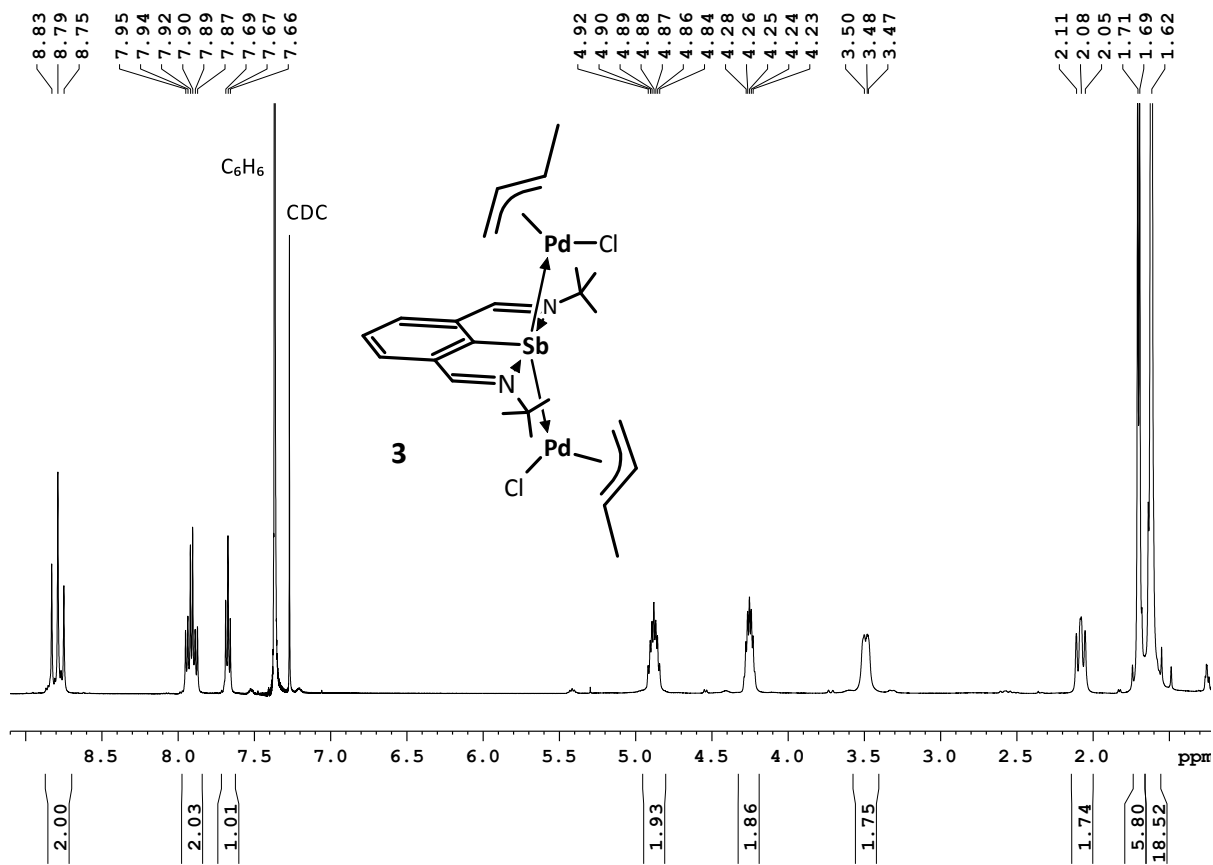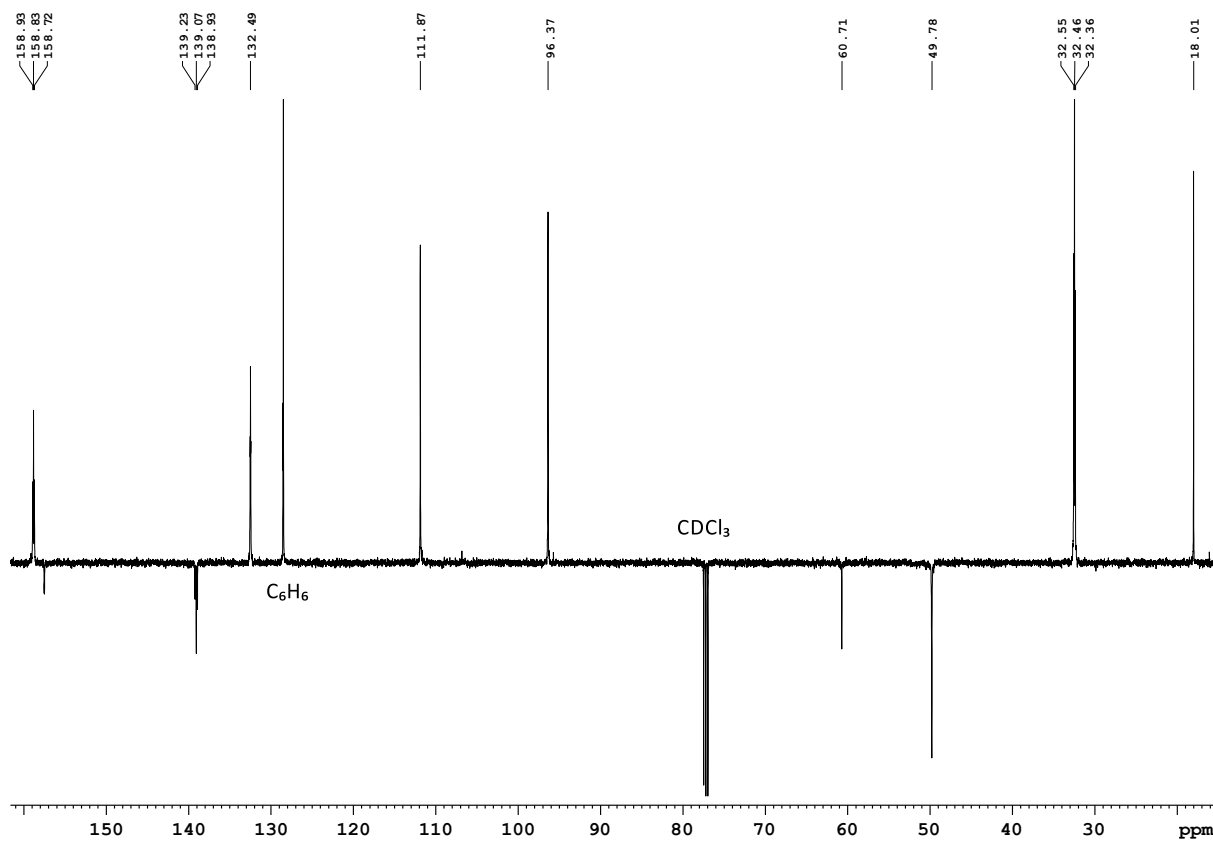

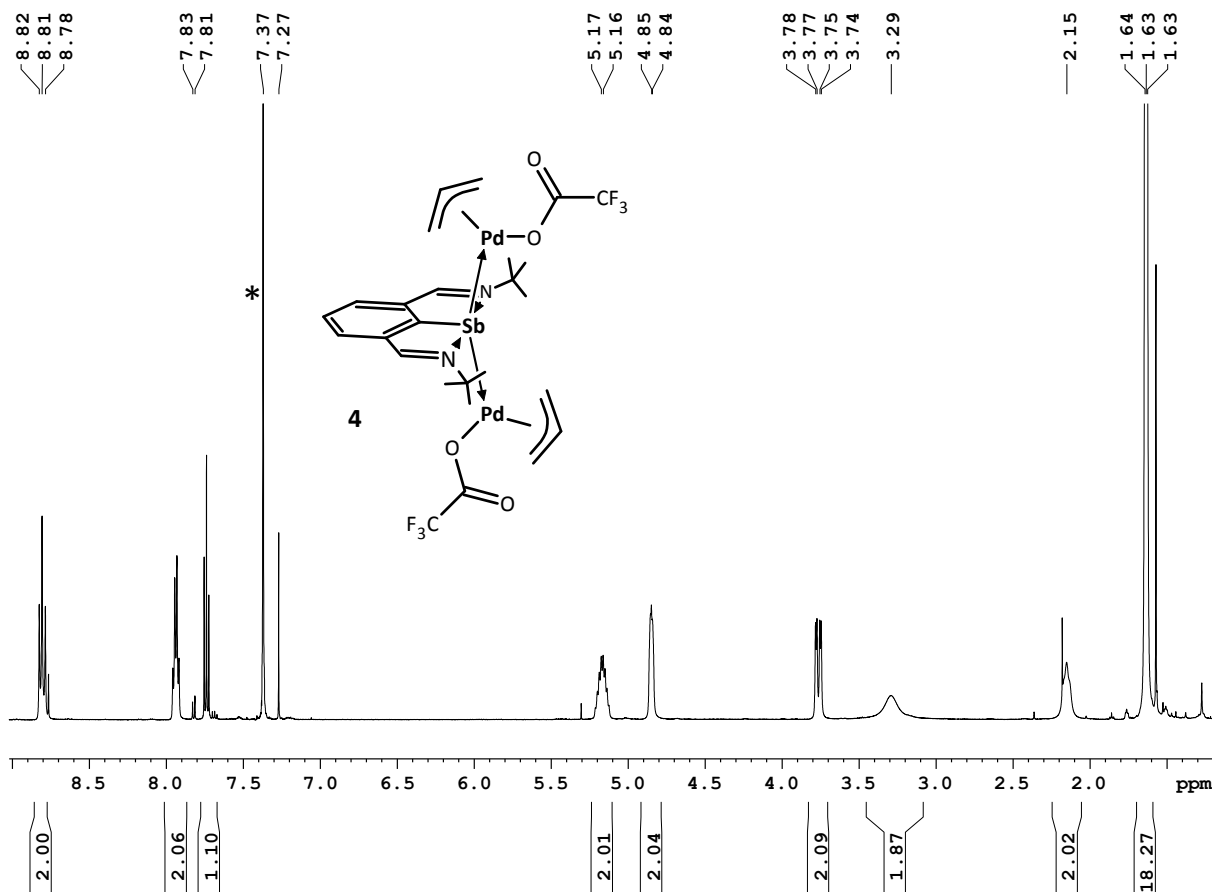

**Figure S5:** <sup>1</sup>H NMR of compound **4** (500.20 MHz, CDCl<sub>3</sub>, 294 K). \* - C<sub>6</sub>H<sub>6</sub> (since benzene solvate single crystals of **4** were dissolved in CDCl<sub>3</sub>).

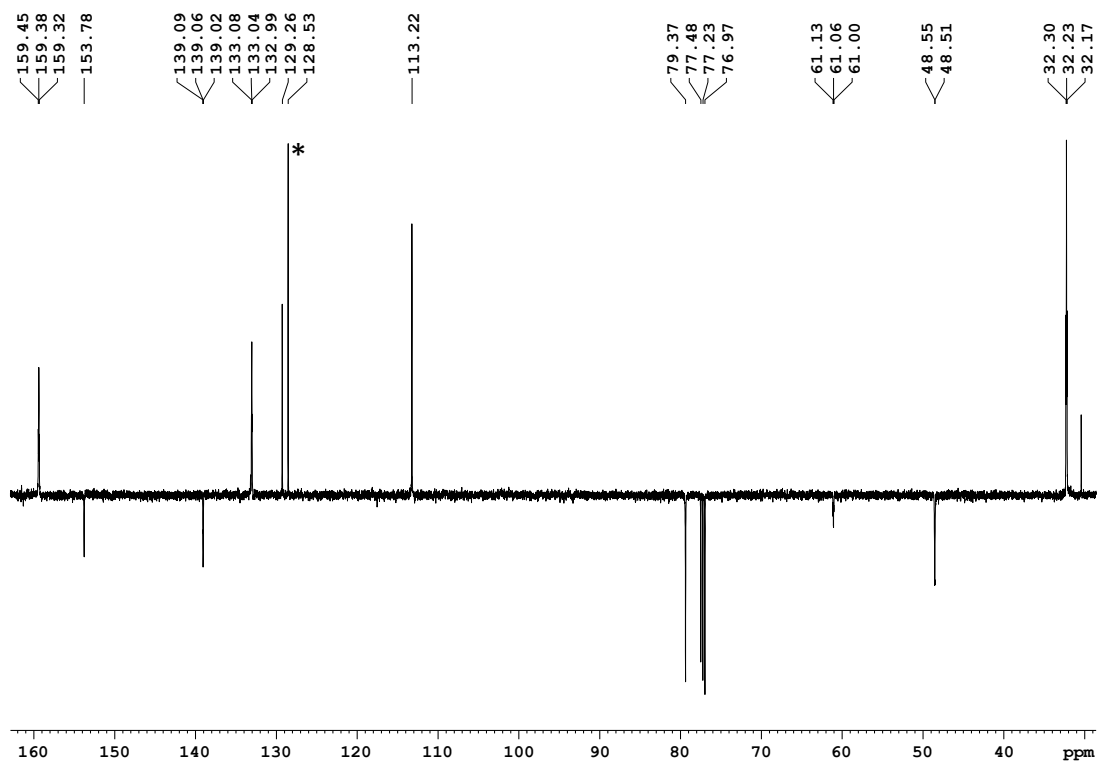

**Figure S6:** <sup>13</sup>C{<sup>1</sup>H} APT NMR of compound **4** (125.78 MHz, CDCl<sub>3</sub>, 294 K). \* - C<sub>6</sub>H<sub>6</sub> (since benzene solvate single crystals of **4** were dissolved in CDCl<sub>3</sub>).

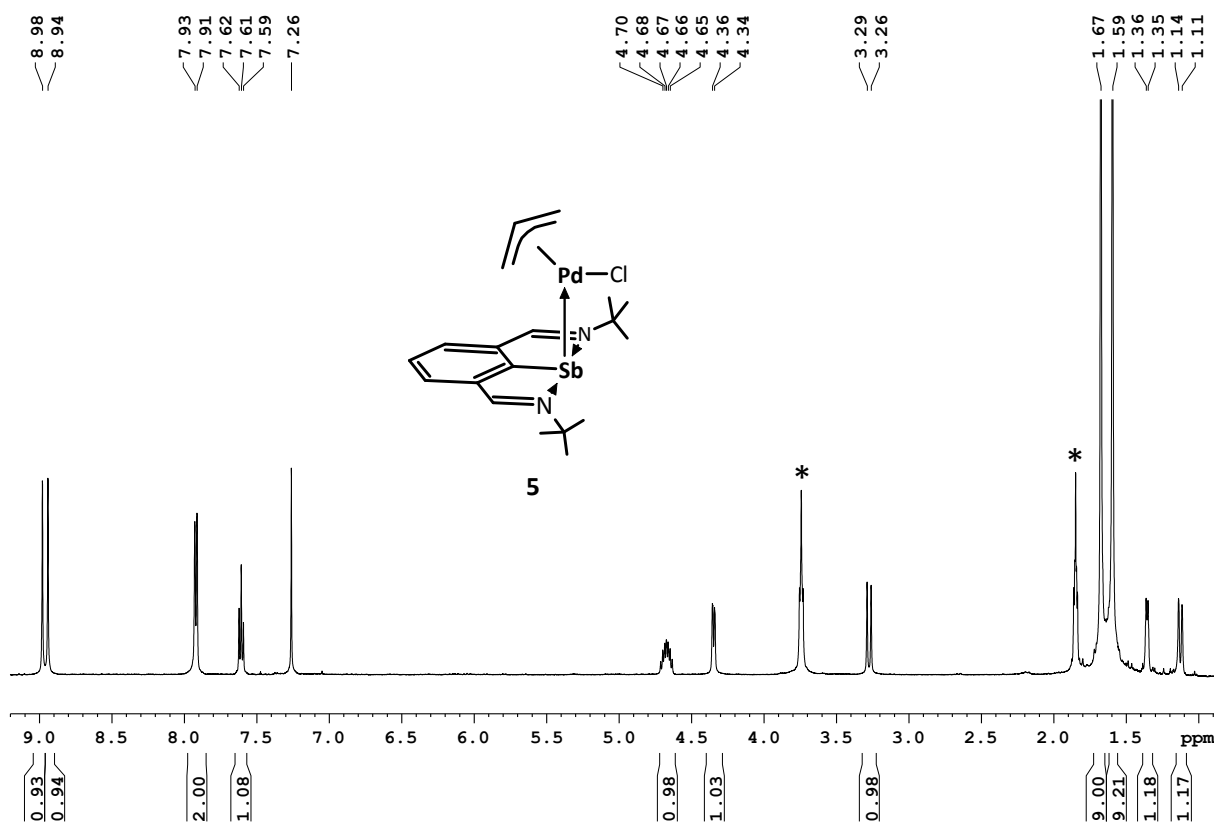

Figure S7:  $^1\text{H NMR}$  of compound 5 (500.20 MHz,  $\text{CDCl}_3$ , 294 K). \* - traces of THF.

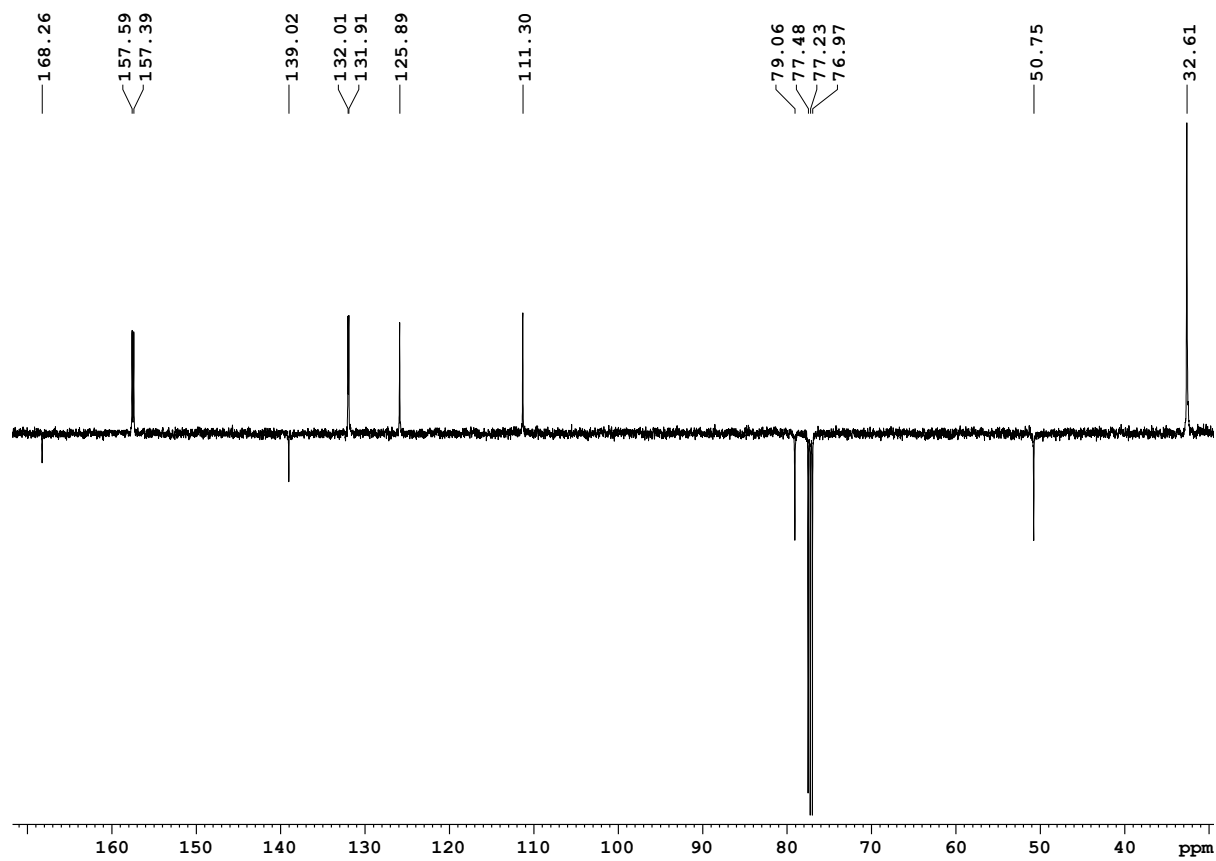

Figure S8:  $^{13}\text{C}\{^1\text{H}\}$  APT NMR of compound 5 (125.78 MHz,  $\text{CDCl}_3$ , 294 K).

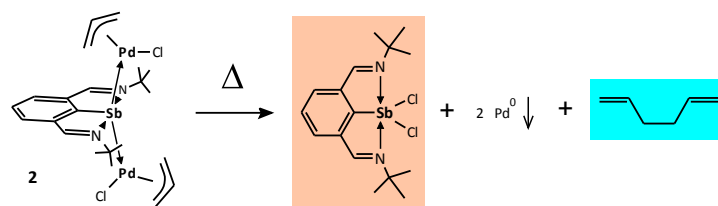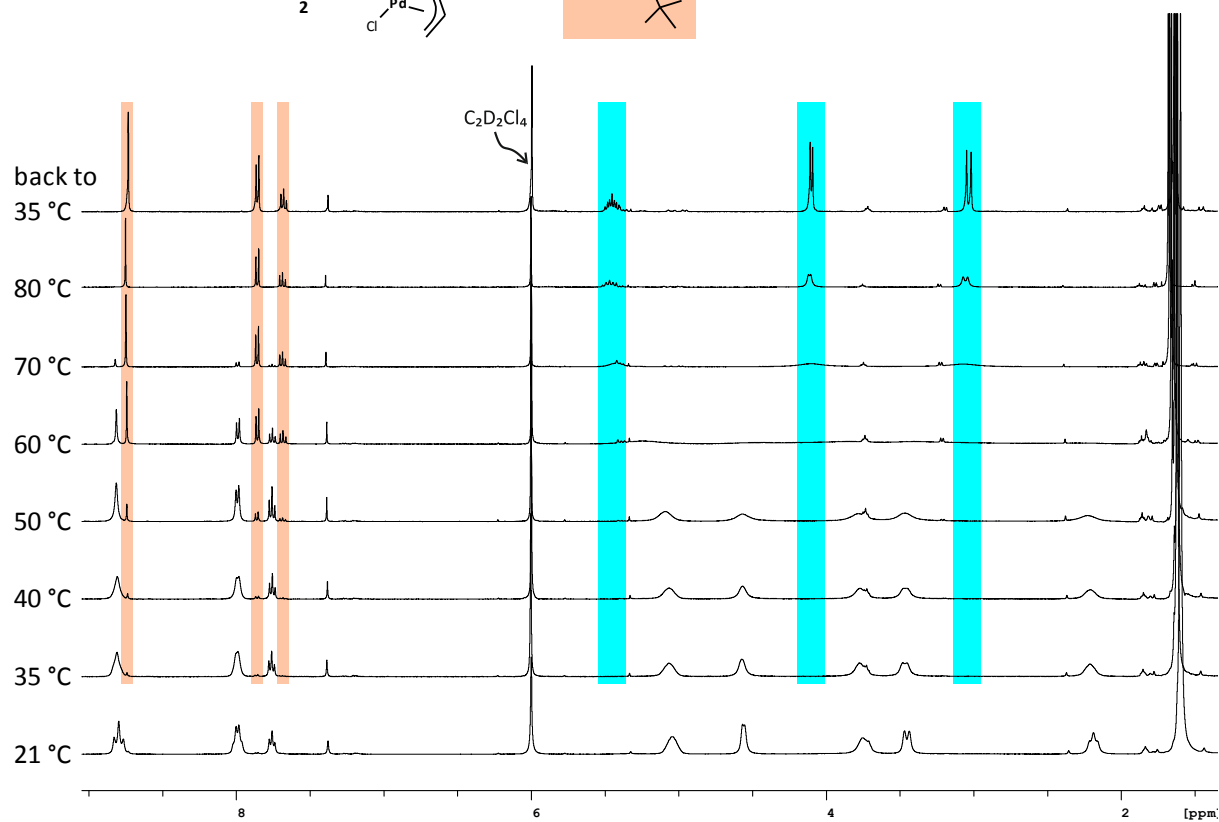

**Figure S9:** Stacked plot of result of VT- $^1\text{H}$  NMR (500.20 MHz) measurement of freshly prepared NMR sample of compound **2** in  $\text{C}_2\text{D}_2\text{Cl}_4$ .

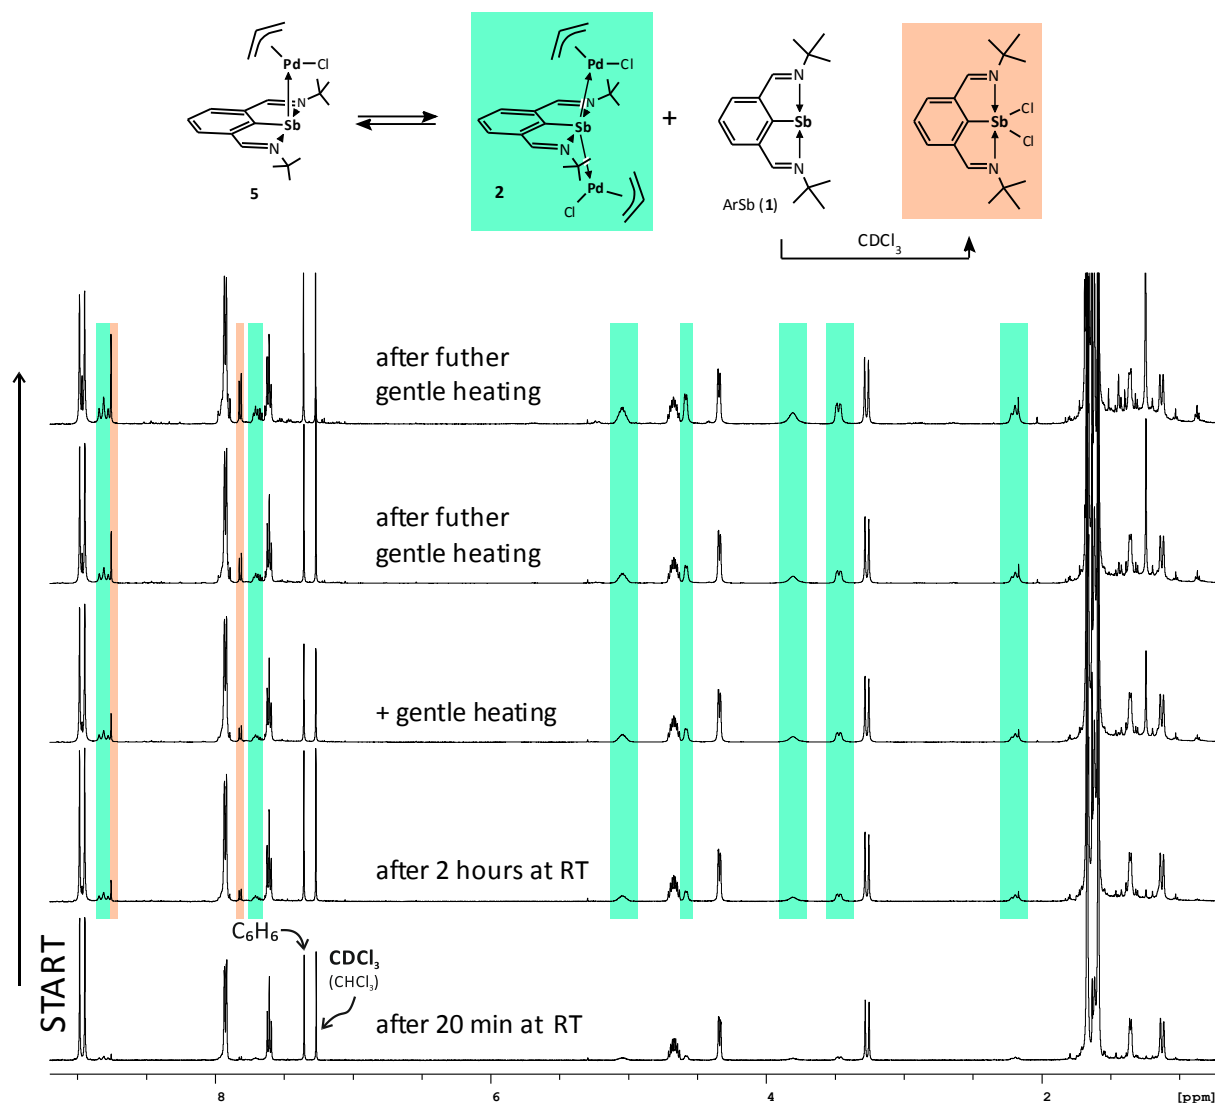

**Figure S10:** Stacked plot of  $^1\text{H}$  NMR (500.20 MHz) spectra showing decomposition of compound **5** in  $\text{CDCl}_3$  (gentle heating means heating the NMR tube up for couple of seconds outside the NMR spectrometer with heat gun set to  $60^\circ\text{C}$ ).

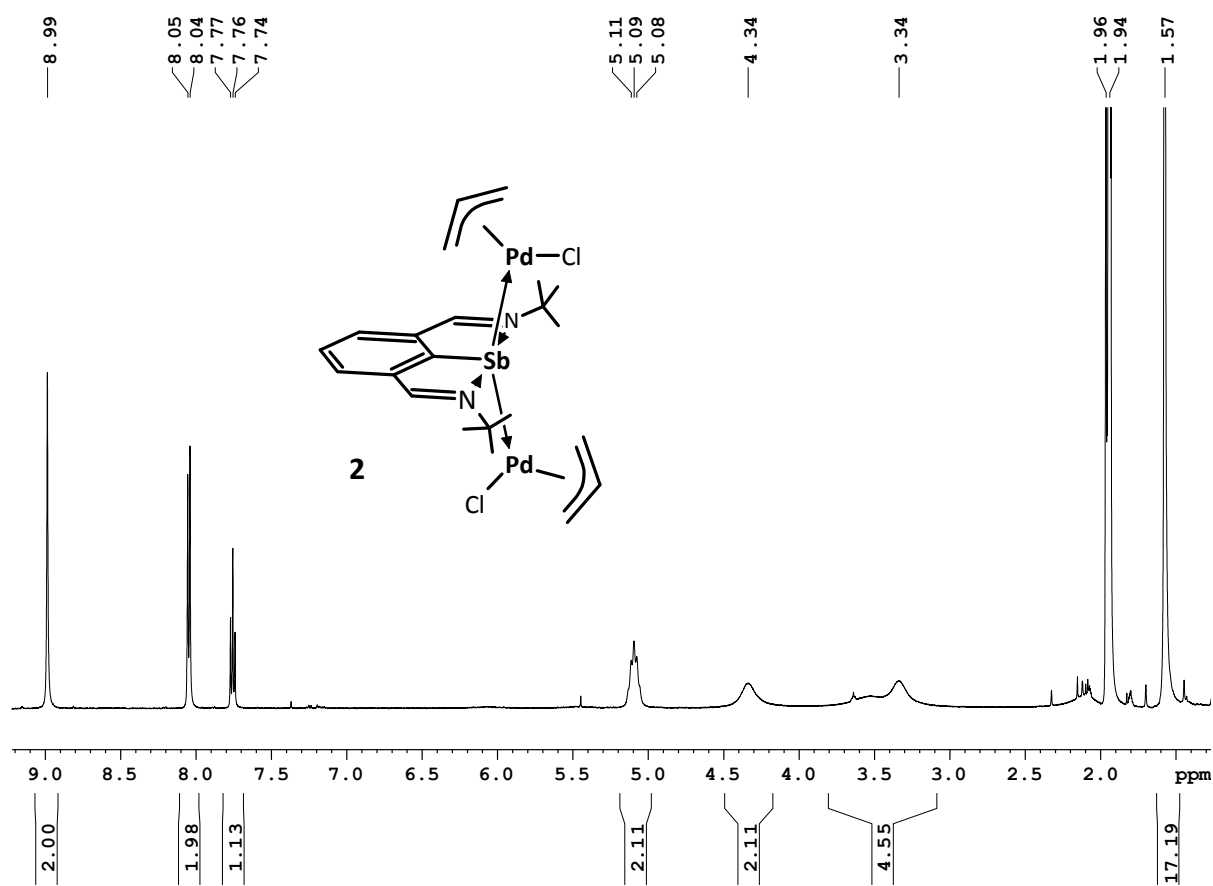

Figure S11: <sup>1</sup>H NMR of compound **2** (500.20 MHz, CD<sub>3</sub>CN, 294 K).

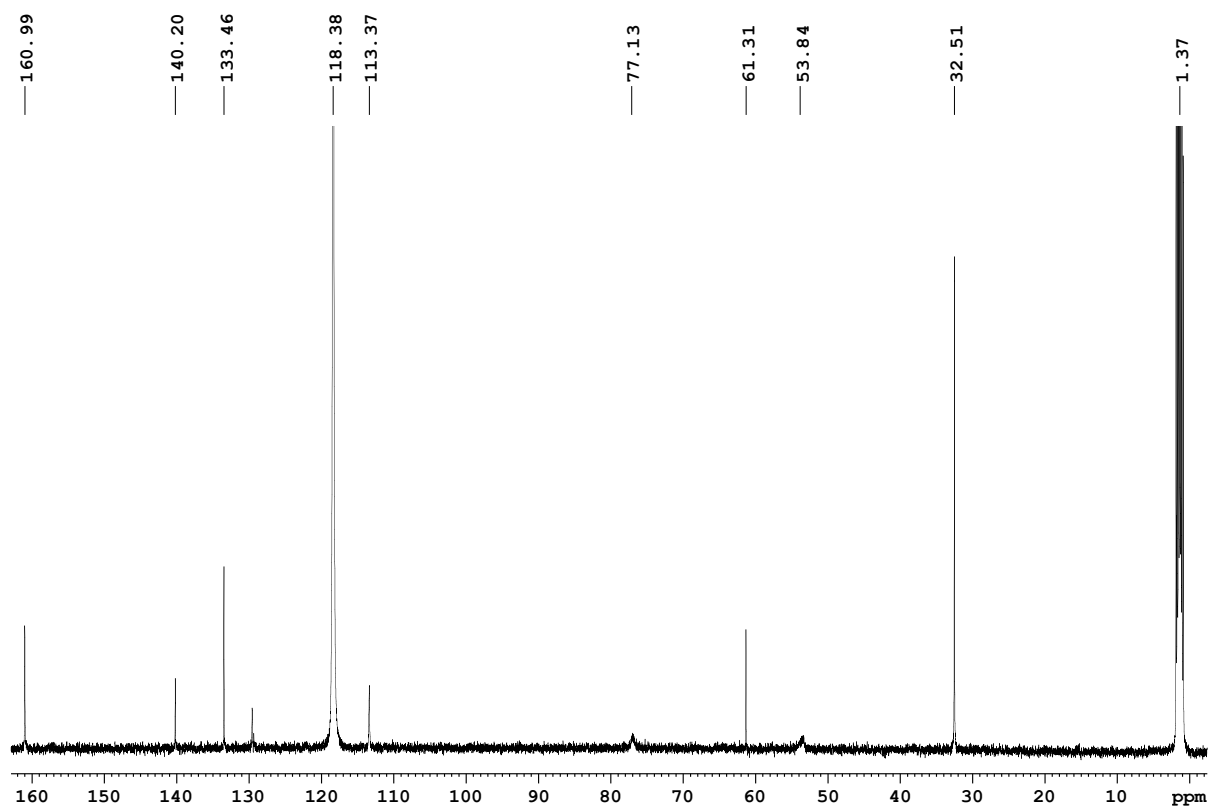

Figure S12: <sup>13</sup>C{<sup>1</sup>H} NMR of compound **2** (125.78 MHz, CD<sub>3</sub>CN, 294 K).



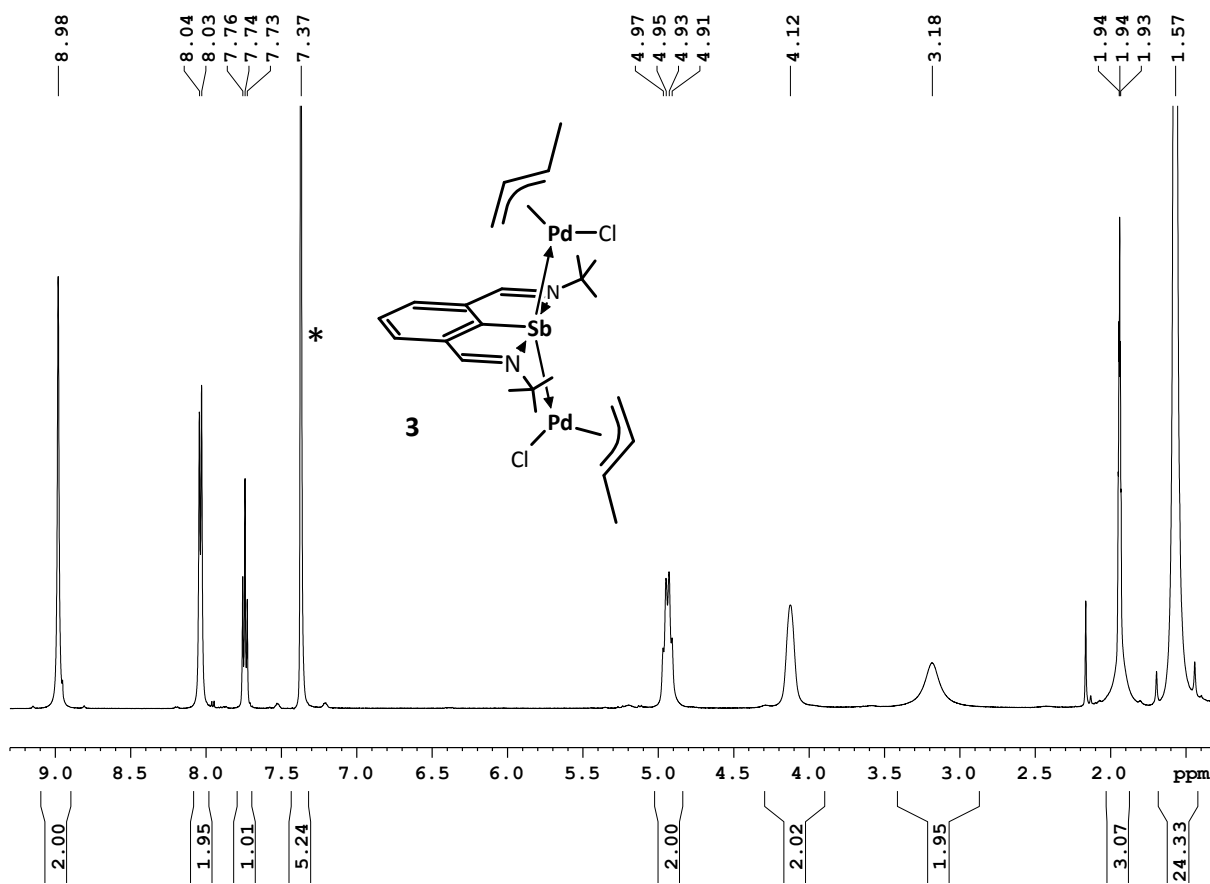

**Figure S13:**  $^1\text{H}$  NMR of compound **3** (500.20 MHz,  $\text{CD}_3\text{CN}$ , 294 K). \* - benzene (since benzene solvate single crystals of **3** were dissolved in  $\text{CD}_3\text{CN}$ ).

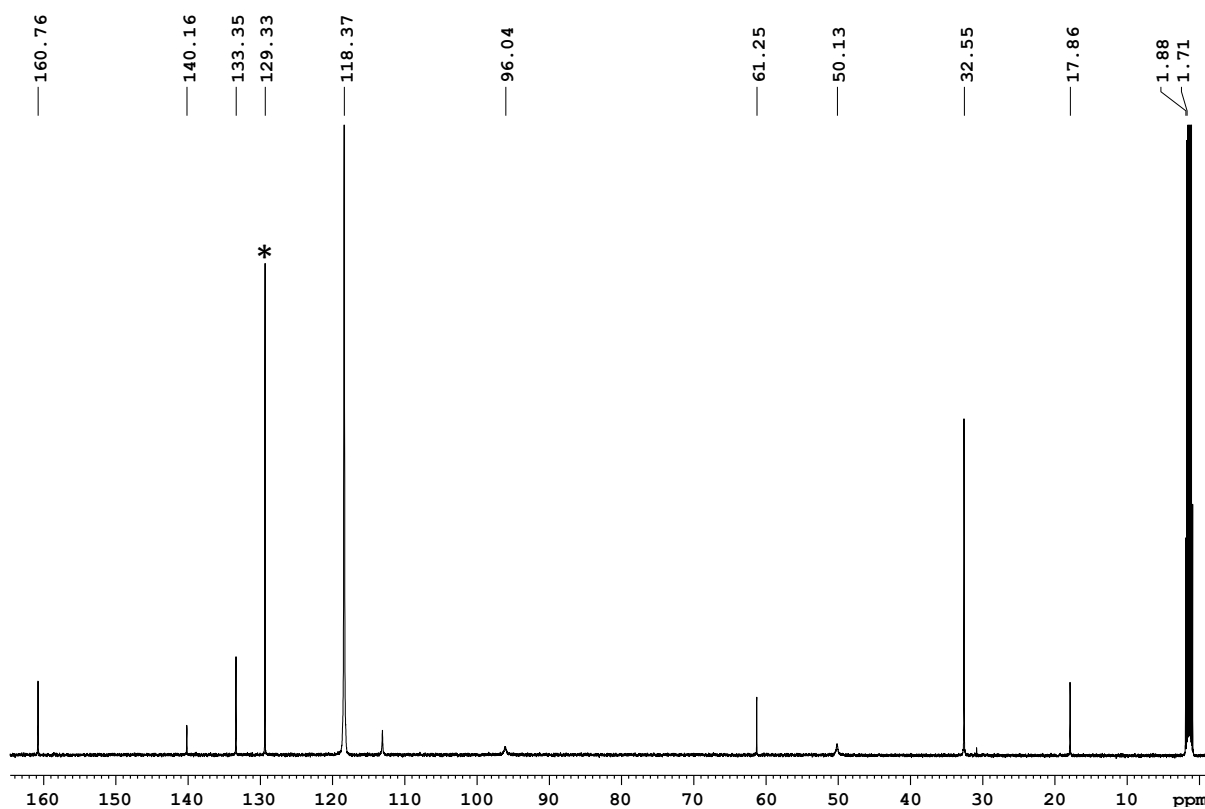

**Figure S14:**  $^{13}\text{C}\{^1\text{H}\}$  NMR of compound **3** (125.78 MHz,  $\text{CD}_3\text{CN}$ , 294 K).

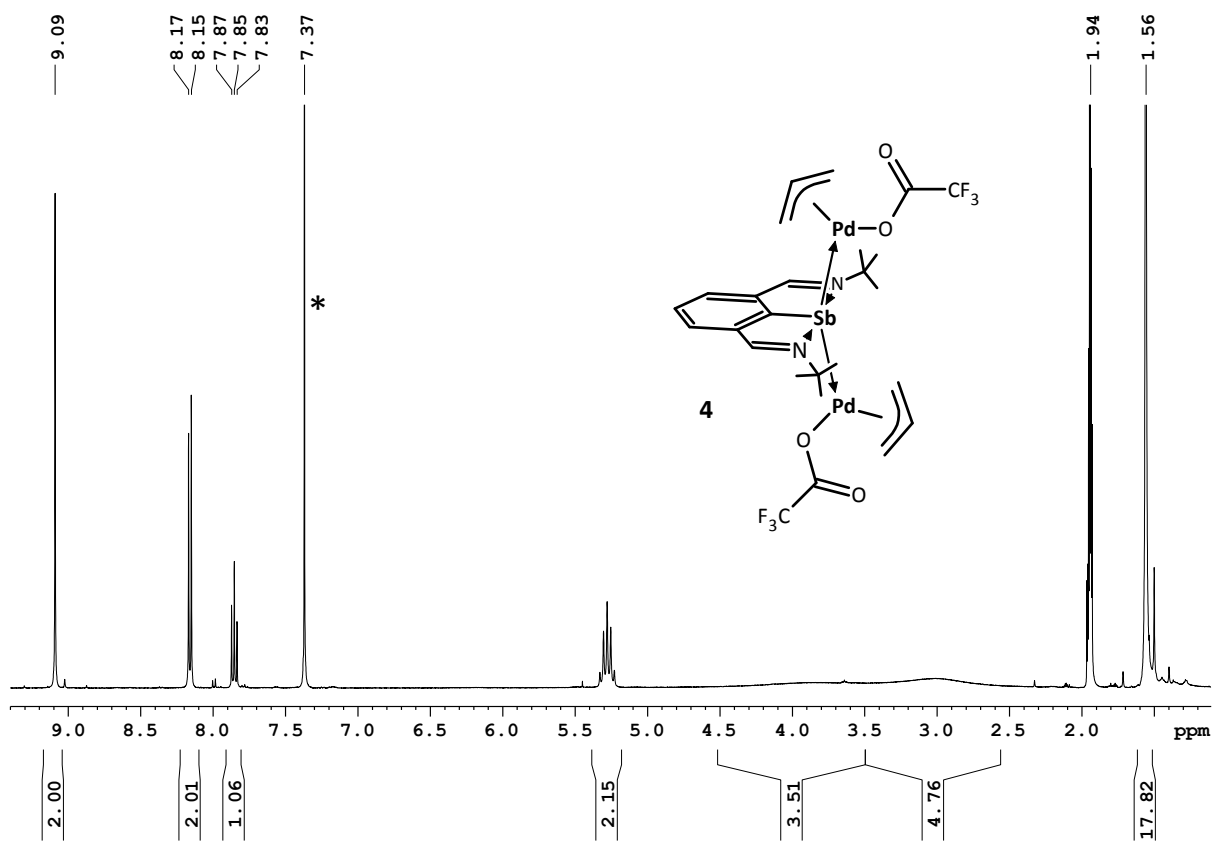

**Figure S15:**  $^1\text{H}$  NMR of compound **4** (500.20 MHz,  $\text{CD}_3\text{CN}$ , 294 K). \* - benzene (since benzene solvate single crystals of **4** were dissolved in  $\text{CD}_3\text{CN}$ ).

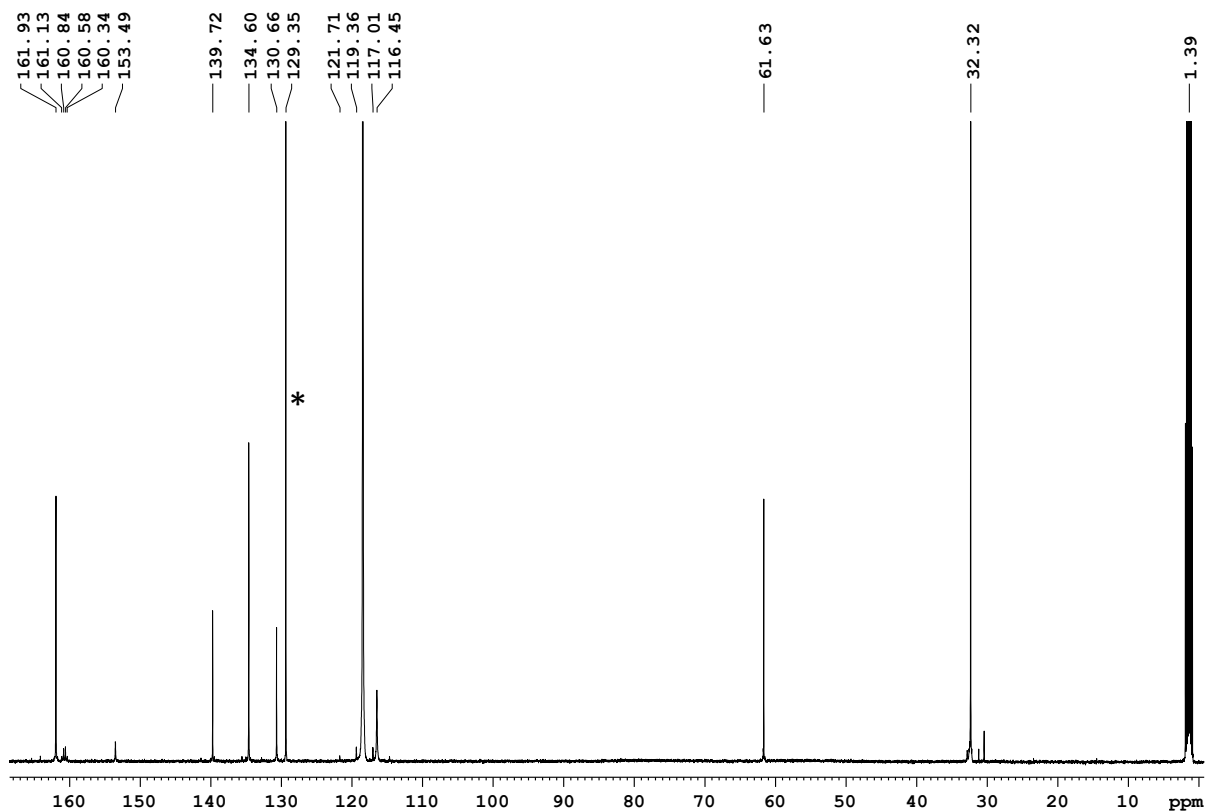

**Figure S16:**  $^{13}\text{C}\{^1\text{H}\}$  NMR of compound **4** (125.78 MHz,  $\text{CD}_3\text{CN}$ , 294 K). \* - benzene (since benzene solvate single crystals of **4** were dissolved in  $\text{CD}_3\text{CN}$ ).

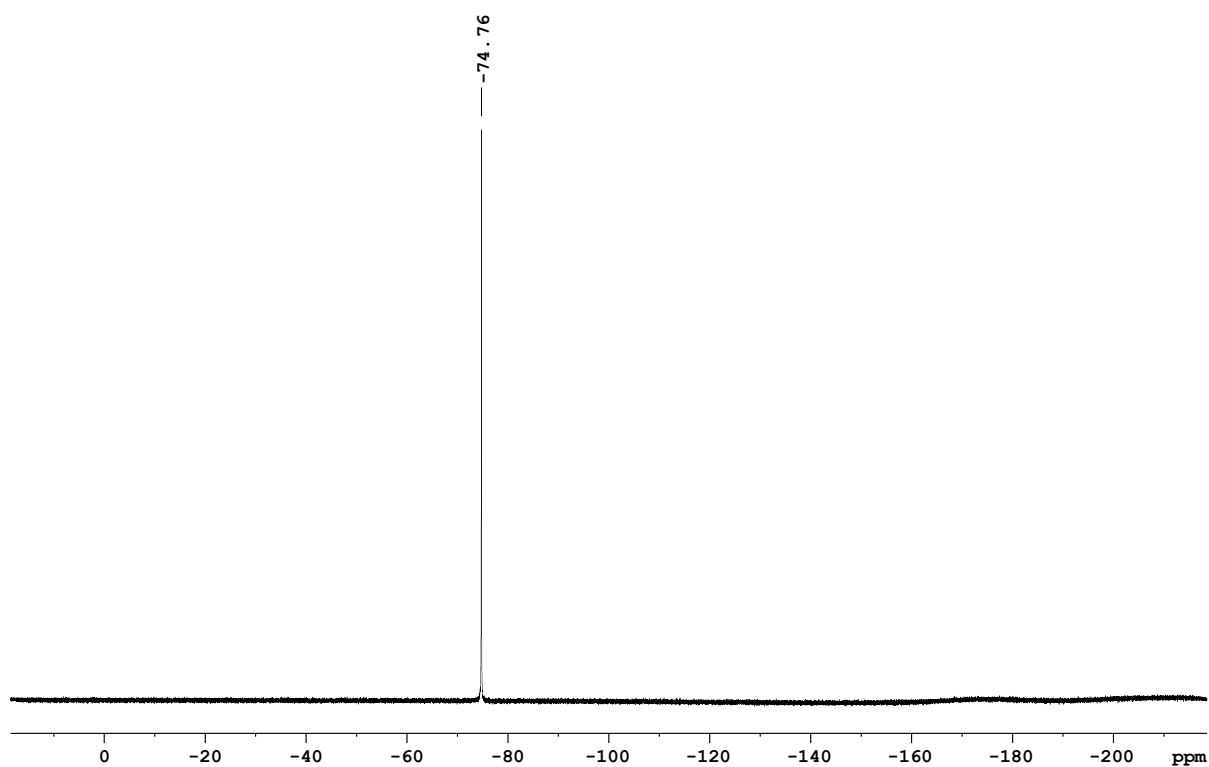

Figure S17:  $^{19}\text{F}$  NMR of compound **4** (376.50 MHz,  $\text{CD}_3\text{CN}$ , 294 K).

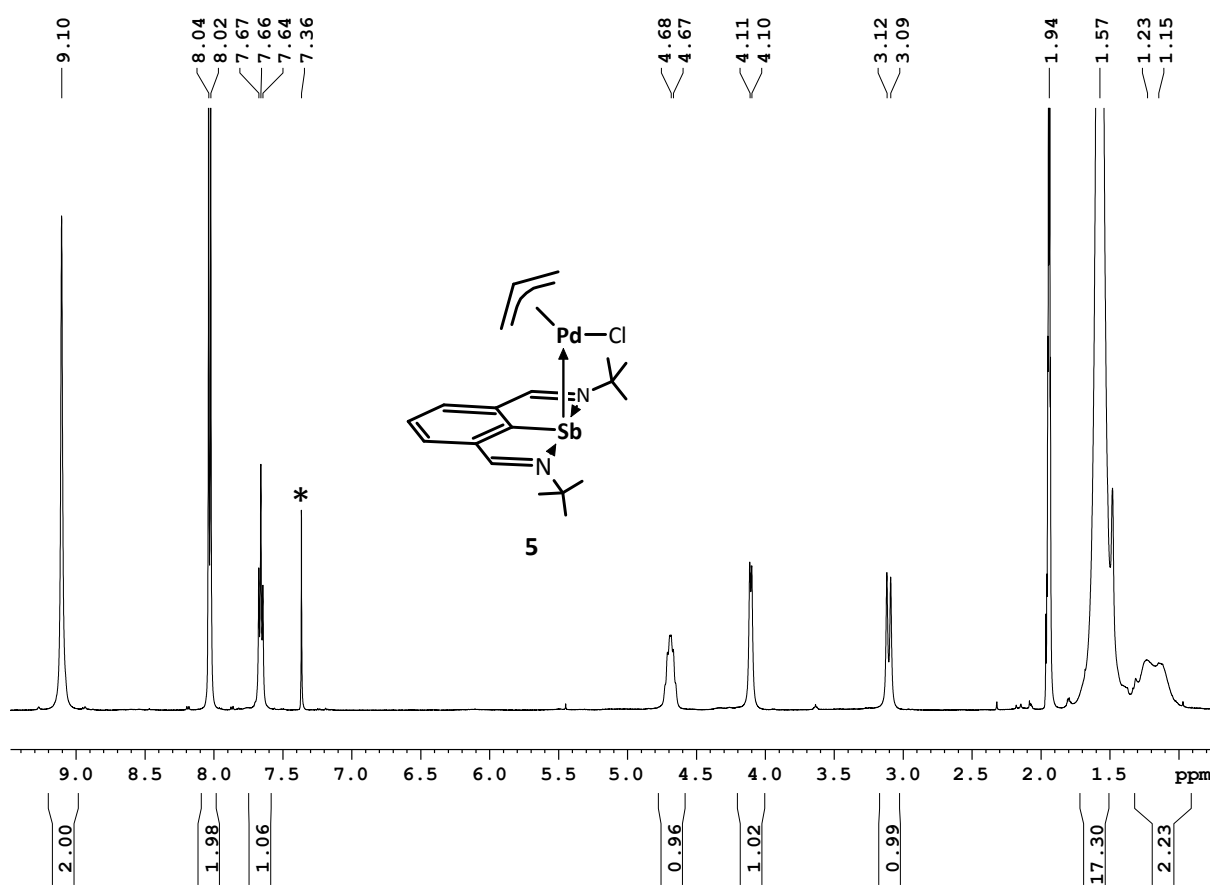

Figure S18:  $^1\text{H}$  NMR of compound **5** (500.20 MHz,  $\text{CD}_3\text{CN}$ , 294 K). \* - traces of benzene.

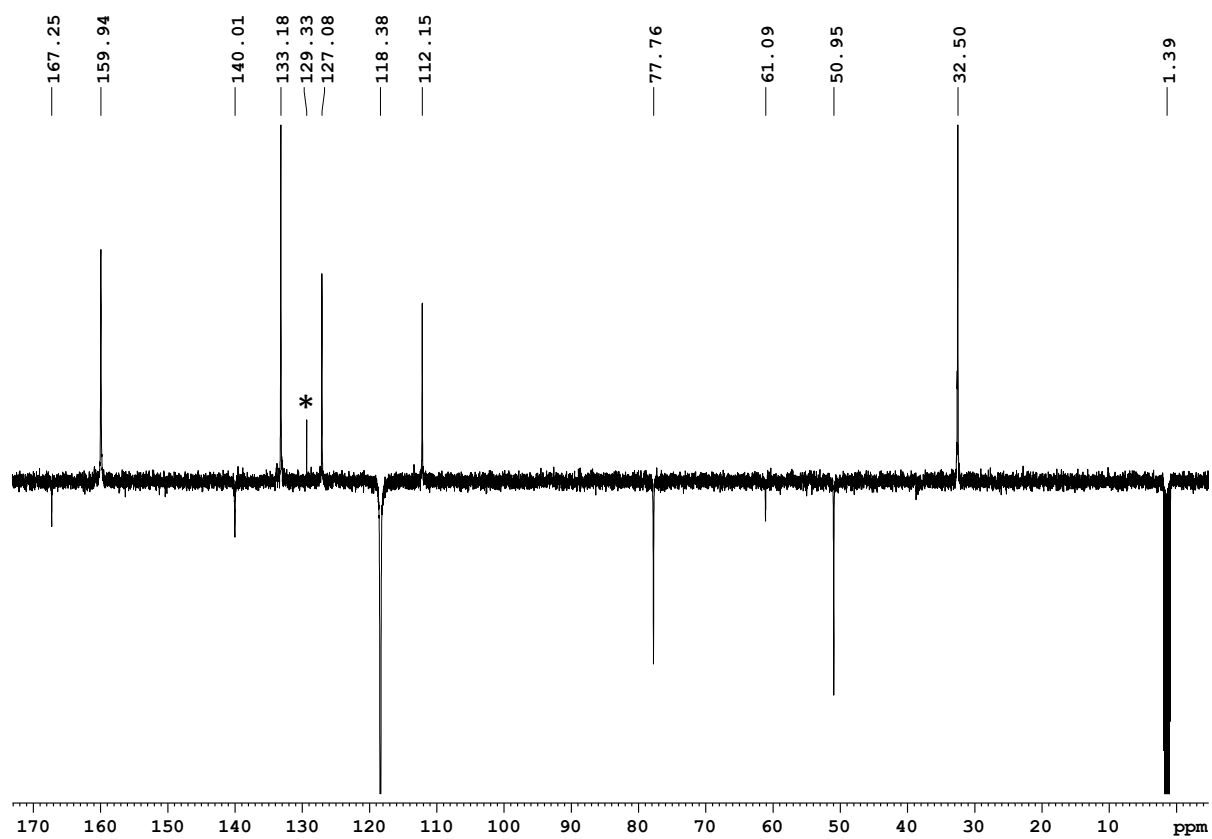

Figure S19:  $^{13}\text{C}\{^1\text{H}\}$  APT NMR of compound **5** (125.78 MHz,  $\text{CD}_3\text{CN}$ , 294 K).

**Table S1.** Crystallographic data for studied compounds **2-5**.

|                                                    | <b>2</b>                                                                          | <b>3</b>                                                                          | <b>4</b>                                                                                        | <b>5</b>                                              |
|----------------------------------------------------|-----------------------------------------------------------------------------------|-----------------------------------------------------------------------------------|-------------------------------------------------------------------------------------------------|-------------------------------------------------------|
| chemical formula                                   | C <sub>22</sub> H <sub>33</sub> Cl <sub>2</sub> N <sub>2</sub> Pd <sub>2</sub> Sb | C <sub>24</sub> H <sub>37</sub> Cl <sub>2</sub> N <sub>2</sub> Pd <sub>2</sub> Sb | C <sub>26</sub> H <sub>33</sub> F <sub>6</sub> N <sub>2</sub> O <sub>4</sub> Pd <sub>2</sub> Sb | C <sub>19</sub> H <sub>28</sub> ClN <sub>2</sub> PdSb |
|                                                    | .2(C <sub>6</sub> H <sub>6</sub> )                                                | .2(C <sub>6</sub> H <sub>6</sub> )                                                | .(C <sub>6</sub> H <sub>6</sub> )                                                               |                                                       |
| Cryst syst                                         | monoclinic                                                                        | orthorhombic                                                                      | orthorhombic                                                                                    | monoclinic                                            |
| Space group                                        | <i>P2<sub>1</sub>/c</i>                                                           | <i>Pca2<sub>1</sub></i>                                                           | <i>Pca2<sub>1</sub></i>                                                                         | <i>P2<sub>1</sub>/c</i>                               |
| <i>a</i> [Å]                                       | 9.9651(10)                                                                        | 26.6878(9)                                                                        | 18.3001(13)                                                                                     | 16.2454(7)                                            |
| <i>b</i> [Å]                                       | 22.9000(14)                                                                       | 12.1213(4)                                                                        | 10.5668(6)                                                                                      | 16.0559(7)                                            |
| <i>c</i> [Å]                                       | 18.0049(13)                                                                       | 23.2984(8)                                                                        | 18.5561(14)                                                                                     | 17.8662(8)                                            |
| β[°]                                               | 118.278(7)                                                                        | 90                                                                                | 90                                                                                              | 113.1910(10)                                          |
| <i>Z</i>                                           | 4                                                                                 | 8                                                                                 | 4                                                                                               | 8                                                     |
| μ[mm <sup>-1</sup> ]                               | 1.9                                                                               | 1.8                                                                               | 1.8                                                                                             | 2.2                                                   |
| <i>D<sub>x</sub></i> [g cm <sup>-3</sup> ]         | 1.63                                                                              | 1.61                                                                              | 1.78                                                                                            | 1.70                                                  |
| Crystal size [mm]                                  | 0.59×0.31×0.26                                                                    | 0.50×0.30×0.10                                                                    | 0.20×0.08×0.07                                                                                  | 0.57×0.27×0.17                                        |
| θ range, [deg]                                     | 1-27.5                                                                            | 1-32                                                                              | 1-27.9                                                                                          | 1-32                                                  |
| <i>T<sub>min</sub></i> , <i>T<sub>max</sub></i>    | 0.579, 0.746                                                                      | 0.543, 0.746                                                                      | 0.466, 0.746                                                                                    | 0.584, 0.746                                          |
| no. of reflns measd                                | 94 388                                                                            | 71 935                                                                            | 30 074                                                                                          | 123 966                                               |
| no. of unique reflns, <i>R<sub>int</sub></i>       | 53544, 0.022                                                                      | 21184, 0.107                                                                      | 8073, 0.134                                                                                     | 13698, 0.083                                          |
| no. of obsd reflns                                 | 6890                                                                              | 13371                                                                             | 5563                                                                                            | 8821                                                  |
| no. of params                                      | 370                                                                               | 817                                                                               | 473                                                                                             | 475                                                   |
| <i>S</i> all data                                  | 1.222                                                                             | 1.031                                                                             | 0.998                                                                                           | 1.093                                                 |
| final <i>R</i> indices [ <i>I</i> >2σ( <i>I</i> )] | 0.024                                                                             | 0.067                                                                             | 0.058                                                                                           | 0.058                                                 |
| w <i>R</i> 2 indices (all data)                    | 0.051                                                                             | 0.084                                                                             | 0.075                                                                                           | 0.069                                                 |
| Δρ, max., min. [e Å <sup>-3</sup> ]                | 0.95, -0.72                                                                       | 0.92, -1.38                                                                       | 0.71, -0.82                                                                                     | 1.28, -0.95                                           |
| CCDC                                               | 1908187                                                                           | 1908186                                                                           | 1908185                                                                                         | 1908188                                               |

$R_{\text{int}} = \sum |F_o^2 - F_{o,\text{mean}}^2| / \sum F_o^2$ ,  $\text{GOF} = [\sum (w(F_o^2 - F_c^2)^2) / (N_{\text{diffrs}} - N_{\text{params}})]^{1/2}$  for all data,  $R(F) = \sum ||F_o| - |F_c|| / \sum |F_o|$  for observed data,  $wR(F^2) = [\sum (w(F_o^2 - F_c^2)^2) / (\sum w(F_o^2)^2)]^{1/2}$  for all data.
